# Supplementary material for: Cationic polymerization of butadiene using alkyl aluminum compounds as co-initiators: an efficient approach toward solid polybutadienes
Source: Royal Society of Chemistry journal article supplement (doi:10.1039/d1py01684a), 2022-01-01
Supplement: d1py01684a1.pdf [file d1py01684a1.pdf]

## Electronic Supplementary Information

### Cationic polymerization of butadiene using alkyl aluminum compounds as co-initiators: an efficient approach toward solid polybutadienes

Victor A. Rozentsvet <sup>a,\*</sup>, Daria M. Ulyanova <sup>a</sup>, Nelly A. Sablina <sup>a</sup>,  
Sergei V. Kostjuk <sup>b,c,d</sup>, Peter M. Tolstoy <sup>e</sup>, Ivan A. Novakov <sup>f</sup>

<sup>a</sup> Institute of Ecology of Volga River Basin, Russian Academy of Science – Branch of Samara Federal Research Scientific Center, Russian Academy of Science, 10 Komzina St, 445003 Togliatti, Russia

<sup>b</sup> Research Institute for Physical Chemical Problems of the Belarusian State University, 14 Leningradskaya St, 220006 Minsk, Belarus

<sup>c</sup> Department of Chemistry, Belarusian State University, 14 Leningradskaya st., 220006 Minsk, Belarus

<sup>d</sup> Sechenov First Moscow State Medical University, Institute for Regenerative Medicine, 2-4 Bolshaya Pirogovskaya str., 119991 Moscow, Russia

<sup>e</sup> St.-Petersburg State University, Department of Chemistry, 7–9 Universitetskaya nab., 199034 St.-Petersburg, Russia

<sup>f</sup> Volgograd State Technical University, 28 Lenin Avenue 400131, Volgograd, Russia

## Experimental

### Polymerization procedures

Polymerization was performed in glass ampules (6 mL) equipped with magnetic stirrer under an argon atmosphere. In a typical polymerization, the ampule was charged by 2.3 mL of solution of butadiene (0.27 g, 5 mmol), isopropylchloride (0.25 g, 3.13 mmol) and CH<sub>2</sub>Cl<sub>2</sub> and was thermostated at 20 °C under agitation for 10 min. Then, the polymerization was initiated by the addition of 0.2 mL of solution of Et<sub>2</sub>AlCl (1.5 mg, 0.0125 mmol). After predetermined time, the reaction was terminated by 0.1 mixture of propylene oxide with methanol. Then, the solution of N-isopropyl-N'-phenyl-1,4-phenylenediamine (4010 NA, 0.54 mg) in CH<sub>2</sub>Cl<sub>2</sub> was added as an antioxidant into the ampoule. The polymer was isolated by evaporation of solvent and unreacted monomer from

ampoules and dried in vacuum at 50 °C up to constant weight. Monomer conversions were determined gravimetrically.

## Characterization

The content of insoluble fraction (IF) in the polymer was determined by additional Soxhlet extraction in toluene for 24 h. The number-average ( $M_n$ ) and weight-average ( $M_w$ ) molecular weights as well as polydispersity ( $\mathcal{D}$ ) were measured by GPC using a Waters-Alliance GPCV-2000 chromatograph equipped with two detectors (refractometric and viscometric) and a set of Styrogel columns with the pore sizes of 500 (HR-2),  $10^3$  (HR-3),  $10^4$  (HR-4), and  $10^5$  (HR-5) Å thermostated at 30 °C. Toluene was used as the eluent and the elution rate was 1 mL min<sup>-1</sup>. Before analyses, all polybutadiene samples were purified by column chromatography using Silica gel 60 from Fluka and chloroform as eluent. After purification, yield of polymer was 98–99% with respect to original (unpurified) polymer.

## Results and discussion

**Table S1** Cationic polymerization of butadiene with <sup>i</sup>PrCl/Et<sub>2</sub>AlCl initiating system at different <sup>i</sup>PrCl to Et<sub>2</sub>AlCl ratios at 20°C<sup>a</sup>

| <sup>i</sup> PrCl<br>Et <sub>2</sub> AlCl | Time<br>(min) | Conv.<br>(%) | $M_n \times 10^{-3}$<br>(g mol <sup>-1</sup> ) | $M_w \times 10^{-3}$<br>(g mol <sup>-1</sup> ) | $\mathcal{D}$ | H <sub>c</sub> <sup>b</sup><br>(mol%) | T <sub>s</sub> <sup>c</sup><br>(°C) |
|-------------------------------------------|---------------|--------------|------------------------------------------------|------------------------------------------------|---------------|---------------------------------------|-------------------------------------|
| 100                                       | 2             | 11.2         | ND <sup>d</sup>                                | ND                                             | ND            | ND                                    | ND                                  |
|                                           | 5             | 53.5         | 4.7                                            | 43.6                                           | 9.3           | ND                                    | ND                                  |
|                                           | 10            | 54.6         | 5.2                                            | 52.3                                           | 10.1          | ND                                    | ND                                  |
|                                           | 30            | 60.2         | 5.1                                            | 132.5                                          | 26.0          | ND                                    | ND                                  |
|                                           | 60            | 65.8         | 5.9                                            | 233.8                                          | 39.6          | 41                                    | 180                                 |
| 500                                       | 5             | 50.0         | 3.0                                            | 16.4                                           | 5.5           | ND                                    | ND                                  |
|                                           | 30            | 57.9         | 4.0                                            | 31.9                                           | 8.0           | 44                                    | 155                                 |
|                                           | 60            | 63.2         | 4.8                                            | 82.7                                           | 17.2          | 42                                    | 169                                 |
|                                           | 240           | 68.4         | 4.9                                            | 202.6                                          | 41.3          | 39                                    | 173                                 |

<sup>a</sup>Polymerization conditions: [C<sub>4</sub>H<sub>6</sub>] = 2.0 M, [Et<sub>2</sub>AlCl] = 5.0 · 10<sup>-3</sup> M, CH<sub>2</sub>Cl<sub>2</sub>. <sup>b</sup> Unsaturation (H<sub>c</sub>) determined by <sup>13</sup>C NMR spectroscopy. <sup>c</sup> Softening point determined by ring-and-ball method.

<sup>d</sup> ND: not determined.

**Table S2** Effect of the order of mixing of the components of catalytic system on the cationic polymerization of butadiene (BD) with  $i\text{PrCl}/\text{Et}_2\text{AlCl}$  initiating system at  $20^\circ\text{C}$ <sup>a</sup>

| Time (min) | Conversion (%)                                 |                                                |
|------------|------------------------------------------------|------------------------------------------------|
|            | BD + $i\text{PrCl}$ + $\text{Et}_2\text{AlCl}$ | BD + $\text{Et}_2\text{AlCl}$ + $i\text{PrCl}$ |
| 5.0        | 52.6                                           | 40.2                                           |
| 30.0       | 61.2                                           | 53.4                                           |
| 240.0      | 65.4                                           | 62.9                                           |
| 1440.0     | 74.1                                           | 72.0                                           |

Polymerization conditions:  $[\text{C}_4\text{H}_6]=2.0$ ,  $[\text{Et}_2\text{AlCl}]=5 \cdot 10^{-3}\text{M}$ ,  $i\text{PrCl}/\text{Et}_2\text{AlCl}=250$ ,  $\text{CH}_2\text{Cl}_2$ .

**Table S3** Effect of temperature on the cationic polymerization of butadiene with  $i\text{PrCl}/\text{AlEt}_2\text{Cl}$  initiating system<sup>a</sup>

| T ( $^\circ\text{C}$ ) | Time (min) | Conv. (%) | $M_n \times 10^{-3}$ ( $\text{g mol}^{-1}$ ) | $M_w \times 10^{-3}$ ( $\text{g mol}^{-1}$ ) | $\bar{D}$ |
|------------------------|------------|-----------|----------------------------------------------|----------------------------------------------|-----------|
| - 30                   | 30         | 1.8       | <i>ND</i> <sup>b</sup>                       | <i>ND</i>                                    | <i>ND</i> |
|                        | 60         | 2.1       | <i>ND</i>                                    | <i>ND</i>                                    | <i>ND</i> |
|                        | 90         | 3.5       | <i>ND</i>                                    | <i>ND</i>                                    | <i>ND</i> |
|                        | 120        | 14.3      | 5.2                                          | 15.1                                         | 2.9       |
|                        | 240        | 37.5      | 5.9                                          | 68.9                                         | 11.7      |
|                        | 1440       | 48.9      | 8.2                                          | 400.7                                        | 48.9      |
| - 78                   | 120        | 0.8       | <i>ND</i>                                    | <i>ND</i>                                    | <i>ND</i> |
|                        | 240        | 1.0       | <i>ND</i>                                    | <i>ND</i>                                    | <i>ND</i> |
|                        | 1440       | 2.1       | <i>ND</i>                                    | <i>ND</i>                                    | <i>ND</i> |

Polymerization conditions:  $[\text{C}_4\text{H}_6]=2.0$  M,  $[\text{Et}_2\text{AlCl}]=5.0 \cdot 10^{-3}$  M,  $[i\text{PrCl}]/[\text{Et}_2\text{AlCl}]=250$ ,  $\text{CH}_2\text{Cl}_2$ . <sup>b</sup> *ND*: not determined.

**Table S4** Effect of fractional addition of  $i\text{PrCl}$  or  $\text{Et}_2\text{AlCl}$  on  $\text{Et}_2\text{AlCl}$  –co-initiated cationic polymerization of butadiene at  $20^\circ\text{C}$  <sup>a</sup>

| Additive                 | Concentration of additive (M) | Time <sup>b</sup> (min) | Time <sup>c</sup> (min) | $[\text{EtAlCl}_2]_{\text{total}}$ (M) | $[\text{iPrCl}]_{\text{total}}$ (M) | Conversion (%) |
|--------------------------|-------------------------------|-------------------------|-------------------------|----------------------------------------|-------------------------------------|----------------|
| –                        | –                             | 0                       | 2                       | $5.0 \cdot 10^{-3}$                    | 1.25                                | 28.7           |
|                          |                               |                         | 5                       |                                        |                                     | 52.6           |
|                          |                               |                         | 10                      |                                        |                                     | 55.1           |
|                          |                               |                         | 15                      |                                        |                                     | 57.9           |
|                          |                               |                         | 30                      |                                        |                                     | 61.2           |
|                          |                               |                         | 60                      |                                        |                                     | 62.7           |
|                          |                               |                         | 90                      |                                        |                                     | 63.1           |
| $i\text{PrCl}$           | 0.5                           | 30                      | 35                      | $5.0 \cdot 10^{-3}$                    | 1.75                                | 62.7           |
|                          |                               |                         | 45                      |                                        |                                     | 63.0           |
|                          |                               |                         | 60                      |                                        |                                     | 63.1           |
|                          | 0.5                           | 60                      | 65                      | $5.0 \cdot 10^{-3}$                    | 2.25                                | 64.6           |
|                          |                               |                         | 75                      |                                        |                                     | 65.0           |
|                          |                               |                         | 90                      |                                        |                                     | 65.5           |
|                          | 0.5                           | 90                      | 95                      | $5.0 \cdot 10^{-3}$                    | 2.75                                | 66.0           |
|                          |                               |                         | 105                     |                                        |                                     | 66.2           |
|                          |                               |                         | 120                     |                                        |                                     | 66.3           |
| $\text{Et}_2\text{AlCl}$ | $2.5 \cdot 10^{-3}$           | 30                      | 32                      | $7.5 \cdot 10^{-3}$                    | 1.25                                | 73.8           |
|                          |                               |                         | 35                      |                                        |                                     | 76.4           |
|                          |                               |                         | 45                      |                                        |                                     | 79.3           |
|                          |                               |                         | 60                      |                                        |                                     | 80.1           |
|                          | $2.5 \cdot 10^{-3}$           | 60                      | 62                      | $1.0 \cdot 10^{-2}$                    | 1.25                                | 86.1           |
|                          |                               |                         | 65                      |                                        |                                     | 87.7           |
|                          |                               |                         | 75                      |                                        |                                     | 89.3           |
|                          |                               |                         | 90                      |                                        |                                     | 90.2           |
|                          | $2.5 \cdot 10^{-3}$           | 90                      | 92                      | $1.25 \cdot 10^{-2}$                   | 1.25                                | 94.1           |
|                          |                               |                         | 95                      |                                        |                                     | 95.0           |
|                          |                               |                         | 105                     |                                        |                                     | 96.9           |
|                          |                               |                         | 120                     |                                        |                                     | 97.8           |
| –                        | –                             | 0                       | 5                       | $1.25 \cdot 10^{-2}$                   | 1.25                                | 64.4           |
|                          |                               |                         | 30                      |                                        |                                     | 73.9           |
|                          |                               |                         | 60                      |                                        |                                     | 81.1           |
|                          |                               |                         | 90                      |                                        |                                     | 83.0           |
|                          |                               |                         | 120                     |                                        |                                     | 85.8           |

<sup>a</sup> Polymerization conditions:  $[\text{C}_4\text{H}_6]=2.0$  моль/л;  $[\text{iPrCl}]_1=[\text{iPrCl}]_2=[\text{iPrCl}]_3=0.5$  M;  $[\text{Et}_2\text{AlCl}]_1=[\text{Et}_2\text{AlCl}]_2=[\text{Et}_2\text{AlCl}]_3=2.5 \cdot 10^{-3}$  M,  $\text{CH}_2\text{Cl}_2$ . <sup>b</sup> Time of introduction of additive into reaction mixture since the beginning of reaction. <sup>c</sup> Total reaction time.

**Table S5** Cationic polymerization of butadiene using  $i\text{PrCl}/\text{EtAlCl}_2$  and  $i\text{PrCl}/\text{Et}_3\text{Al}$  initiating system at 20 °C <sup>a</sup>

| LA                  | $\frac{i\text{PrCl}}{\text{LA}}$ | Time (min) | Conv. (%) | $M_n \times 10^{-3}$ (g mol <sup>-1</sup> ) | $M_w \times 10^{-3}$ (g mol <sup>-1</sup> ) | $\bar{D}$ |
|---------------------|----------------------------------|------------|-----------|---------------------------------------------|---------------------------------------------|-----------|
| EtAlCl <sub>2</sub> | 0                                | 1          | 5.5       | ND <sup>b</sup>                             | ND                                          | ND        |
|                     | 100                              | 2          | 53.4      | 3.8                                         | 32.8                                        | 8.6       |
|                     |                                  | 5          | 59.2      | 4.2                                         | 42.5                                        | 10.1      |
|                     |                                  | 30         | 68.9      | 4.9                                         | 241.8                                       | 49.3      |
|                     |                                  | 60         | 70.4      | ND                                          | ND                                          | ND        |
|                     | 500                              | 1          | 51.8      | 2.9                                         | 20.7                                        | 7.1       |
| 60                  |                                  | 71.8       | 5.0       | 236.3                                       | 47.3                                        |           |
| Et <sub>3</sub> Al  | 0                                | 30         | 0.2       | ND                                          | ND                                          | ND        |
|                     | 500                              | 60         | 3.2       | ND                                          | ND                                          | ND        |

<sup>a</sup> Polymerization conditions:  $[\text{C}_4\text{H}_6]=2.0$  M,  $[\text{EtAlCl}_2] = [\text{Et}_3\text{Al}] = 5.0 \cdot 10^{-3}$  M,  $\text{CH}_2\text{Cl}_2$ . LA: Lewis acid. <sup>b</sup> ND: not determined.

**Table S6** Cationic polymerization of butadiene with 2-chlorobutane (CB)/Et<sub>2</sub>AlCl initiating system at 20°C <sup>a</sup>

| $\frac{\text{CB}}{\text{Et}_2\text{AlCl}}$ | Time (min) | Conv. (%) | $M_n \times 10^{-3}$ (g mol <sup>-1</sup> ) | $M_w \times 10^{-3}$ (g mol <sup>-1</sup> ) | $\bar{D}$ |
|--------------------------------------------|------------|-----------|---------------------------------------------|---------------------------------------------|-----------|
| 100                                        | 2          | 38.8      | 3.1                                         | 14.7                                        | 4.7       |
|                                            | 5          | 46.7      | 3.3                                         | 19.4                                        | 5.9       |
|                                            | 30         | 56.7      | 4.1                                         | 41.2                                        | 10.0      |
|                                            | 240        | 68.3      | 4.9                                         | 109.1                                       | 22.3      |
|                                            | 1440       | 71.9      | 5.7                                         | 222.0                                       | 38.9      |
| 500                                        | 5          | 45.7      | 2.6                                         | 11.9                                        | 4.6       |
|                                            | 30         | 53.2      | 3.1                                         | 18.8                                        | 6.1       |
|                                            | 60         | 58.5      | 3.2                                         | 23.9                                        | 7.5       |
|                                            | 240        | 65.7      | 3.6                                         | 40.2                                        | 11.2      |
|                                            | 1440       | 70.1      | 3.8                                         | 52.0                                        | 13.7      |

<sup>a</sup> Polymerization conditions:  $[\text{C}_4\text{H}_6]=2.0$  M,  $[\text{Et}_2\text{AlCl}] = 5.0 \cdot 10^{-3}$  M,  $\text{CH}_2\text{Cl}_2$ .

**Table S7** Effect of reaction temperature on the cationic polymerization of butadiene with 2-chlorobutane (CB)/Et<sub>2</sub>AlCl initiating system <sup>a</sup>

| T (°C) | Time (min) | Conv. (%) | M <sub>n</sub> ×10 <sup>-3</sup> (g mol <sup>-1</sup> ) | M <sub>w</sub> ×10 <sup>-3</sup> (g mol <sup>-1</sup> ) | Đ    | IF <sup>b</sup> (%) | H <sub>c</sub> (mol%) |
|--------|------------|-----------|---------------------------------------------------------|---------------------------------------------------------|------|---------------------|-----------------------|
| - 30   | 30         | 1.1       | ND <sup>c</sup>                                         | ND                                                      | ND   | ND                  | ND                    |
|        | 60         | 4.0       | ND                                                      | ND                                                      | ND   | ND                  | ND                    |
|        | 65         | 7.9       | ND                                                      | ND                                                      | ND   | ND                  | ND                    |
|        | 75         | 16.4      | 5.3                                                     | 13.2                                                    | 2.5  | 0                   | ND                    |
|        | 120        | 58.5      | 6.1                                                     | 128.8                                                   | 21.1 | 0                   | 53                    |
|        | 240        | 65.3      | 6.6                                                     | 546.0                                                   | 82.7 | 0                   | 48                    |
|        | 1440       | 78.4      | ND                                                      | ND                                                      | ND   | 52.1                | ND                    |
| - 78   | 120        | 0.5       | ND                                                      | ND                                                      | ND   | ND                  | ND                    |
|        | 240        | 1.8       | ND                                                      | ND                                                      | ND   | ND                  | ND                    |
|        | 1440       | 3.6       | ND                                                      | ND                                                      | ND   | ND                  | ND                    |

<sup>a</sup> Polymerization conditions: [C<sub>4</sub>H<sub>6</sub>] = 2.0 M, [Et<sub>2</sub>AlCl] = 5.0·10<sup>-3</sup> M, CB/Et<sub>2</sub>AlCl=250, CH<sub>2</sub>Cl<sub>2</sub>.

<sup>b</sup> IF: insoluble fraction. <sup>c</sup> ND: not determined.

**Table S8** Effect of Lewis acid (LA) nature on the cationic polymerization of butadiene and properties of obtained polybutadienes<sup>a</sup>

| Lewis acid           | <sup>i</sup> PrCl<br>LA | Time (min)       | Conv. (%) | H <sub>c</sub> (mol%) | Content of units (mol%) |      |
|----------------------|-------------------------|------------------|-----------|-----------------------|-------------------------|------|
|                      |                         |                  |           |                       | <i>trans</i> -1,4       | 1,2- |
| AlEt <sub>2</sub> Cl | 50                      | 30               | 58.6      | 42                    | 82                      | 18   |
|                      |                         | 3                | 45.4      | 45                    | 81                      | 19   |
|                      | 250                     | 5                | 52.6      | 45                    | 80                      | 20   |
|                      |                         | 30               | 61.2      | 43                    | 80                      | 20   |
|                      |                         | 60               | 62.7      | 41                    | 81                      | 19   |
|                      | 500                     | 30               | 57.9      | 44                    | 80                      | 20   |
|                      |                         | 60               | 63.2      | 42                    | 82                      | 18   |
| AlEt <sub>3</sub>    | 500                     | 140 <sup>b</sup> | 62.5      | 42                    | 81                      | 19   |
| AlEtCl <sub>2</sub>  | 500                     | 60               | 71.8      | 41                    | 82                      | 18   |

<sup>a</sup> Polymerization conditions: [C<sub>4</sub>H<sub>6</sub>] = 2.0 M, [Et<sub>2</sub>AlCl]= [EtAlCl<sub>2</sub>] = [Et<sub>3</sub>Al] = 5.0·10<sup>-3</sup> M, 20°C, CH<sub>2</sub>Cl<sub>2</sub>. <sup>b</sup> Induction period: 80 min.

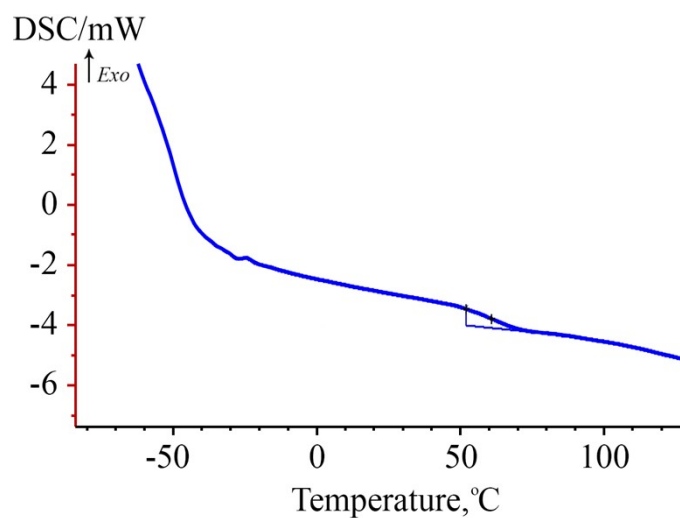

**Fig.S1** DSC curve of polybutadiene synthesized using  $i\text{PrCl}/\text{AlEt}_2\text{Cl}$ .

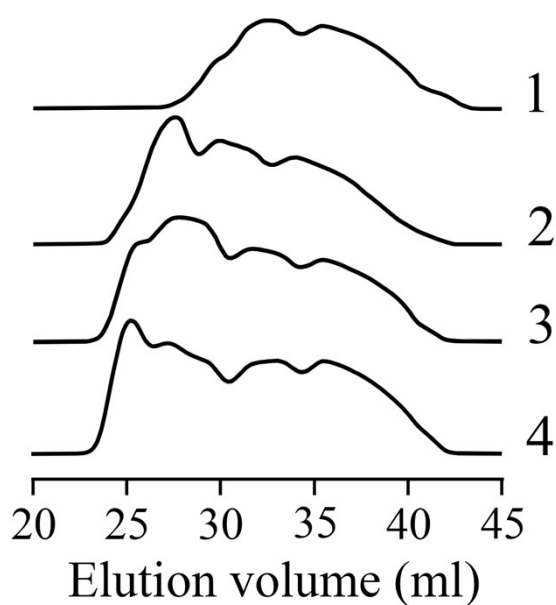

**Fig. S2** SEC traces of polybutadienes synthesized with  $i\text{PrCl}/\text{AlEtCl}_2$  initiating system ( $i\text{PrCl}/\text{Et}_2\text{AlCl}=500$ ) at different monomer conversions. Conversion (%): 51.8 (1), 58.9 (2), 70.7 (3), 71.8 (4). See Table 3 for experimental conditions.

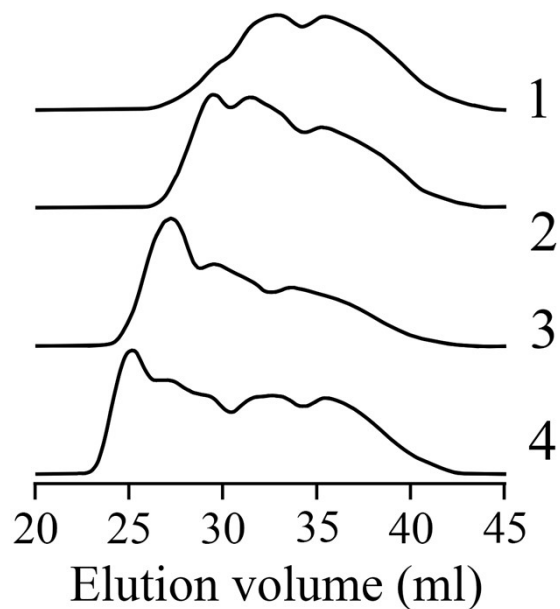

**Fig. S3** SEC traces of polybutadienes synthesized with  $i\text{PrCl}/\text{AlEt}_3$  initiating system ( $i\text{PrCl}/\text{Et}_2\text{AlCl}=500$ ) at different monomer conversions. Conversion (%): 55.0 (1), 60.8 (2), 61.9 (3), 70.7 (4). See Table S3 for experimental conditions.

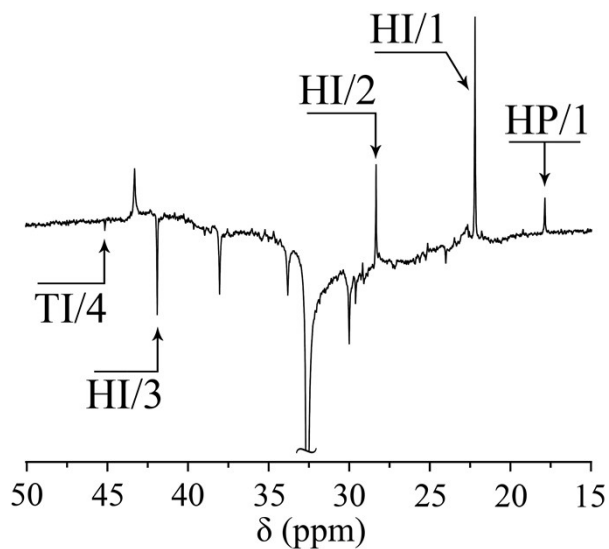

**Fig. S4**  $^{13}\text{C}$  DEPT- $135^\circ$  spectrum of polybutadiene synthesized with  $i\text{PrCl}/\text{Et}_2\text{AlCl}$  initiating system. The polymerization conditions presented in Fig. 4.



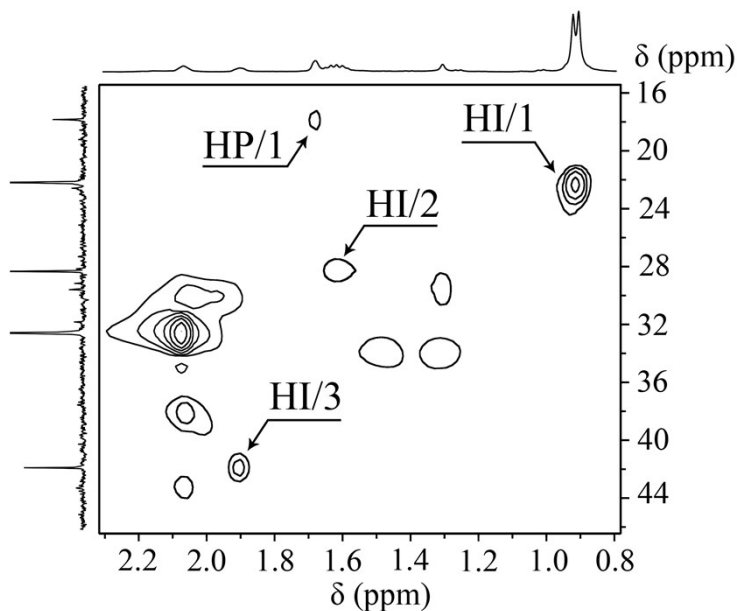

**Fig. S5** Aliphatic part of  $^1\text{H}$ ,  $^{13}\text{C}$  HSQC NMR spectrum of polybutadiene synthesized with  $^i\text{PrCl}/\text{Et}_2\text{AlCl}$  initiating system. The polymerization conditions presented in Fig. 4.

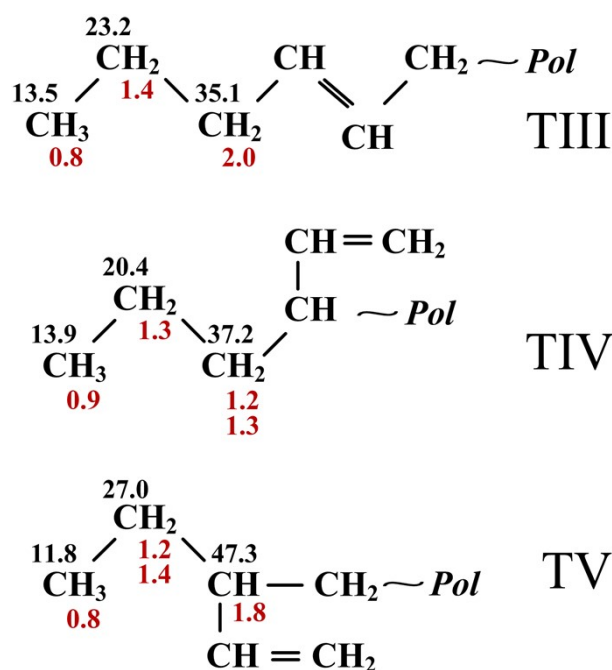

**Fig. S6** The tentative structures of terminal units possessing ethyl group connected with *trans*-1,4- (TIII), 1,2- (TIV) and 2,1- (TV), which are formed after chain-transfer to  $\text{Et}_{3-n}\text{AlCl}_n$  ( $n=0, 1, 2$ ). Numbers indicate the calculated chemical shifts for carbon (above C) and hydrogen (below H) atoms.

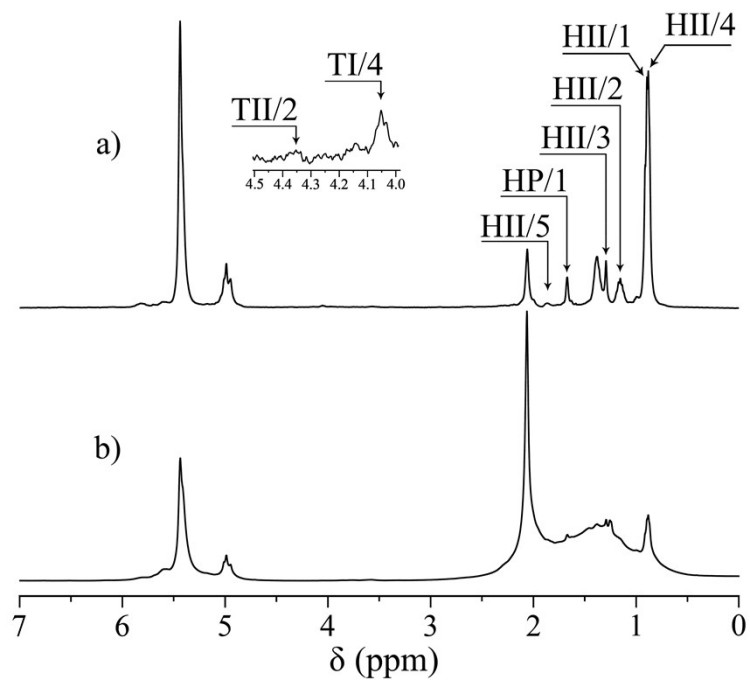

**Fig. S7**  $^1\text{H}$  NMR spectrum of polybutadiene recorded with (a) and without (b)  $T_2$  filter synthesized with CB/ $\text{Et}_2\text{AlCl}$  initiating system. Polymerization conditions:  $[\text{C}_4\text{H}_6] = 2.0 \text{ M}$ ,  $[\text{Et}_2\text{AlCl}] = 5.0 \cdot 10^{-3} \text{ M}$ , CB/ $\text{AlEt}_2\text{Cl} = 250$ ,  $\text{CH}_2\text{Cl}_2$ . Temperature:  $-30 \text{ }^\circ\text{C}$ , time: 2 h, conversion 58.5 %.

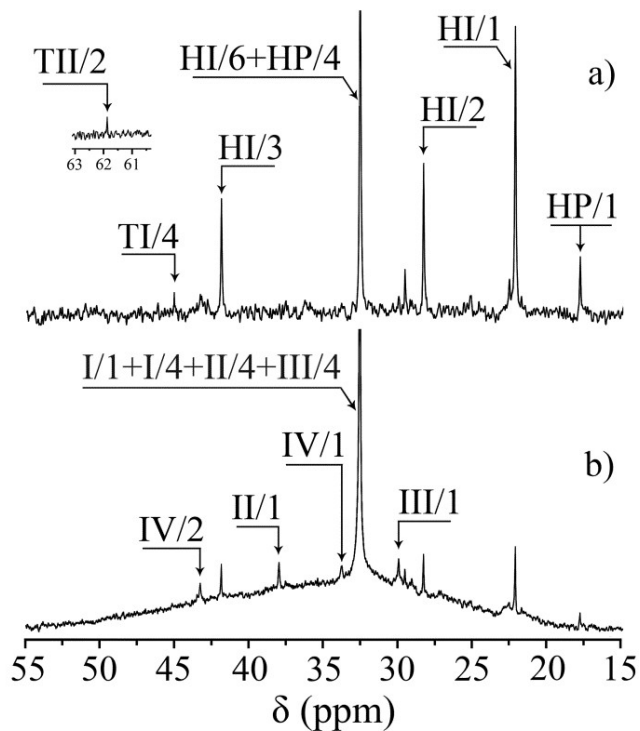

**Fig. S8** Aliphatic regions of  $^{13}\text{C}$  NMR spectra of polybutadiene recorded with (a) and without  $T_2$  filter (b), respectively. Polymerization conditions:  $[\text{C}_4\text{H}_6] = 2.0 \text{ M}$ ,  $[\text{Et}_2\text{AlCl}] = 5.0 \cdot 10^{-3} \text{ M}$ ,  ${}^i\text{PrCl}/\text{Et}_2\text{AlCl} = 250$ ,  $20^\circ\text{C}$ ,  $\text{CH}_2\text{Cl}_2$ , time: 60 min, conversion 62.7%.  $M_n = 5.2 \cdot 10^3 \text{ g mol}^{-1}$ ,  $M_w = 76.4 \cdot 10^3 \text{ g mol}^{-1}$ ,  $\text{Đ} = 14.7$

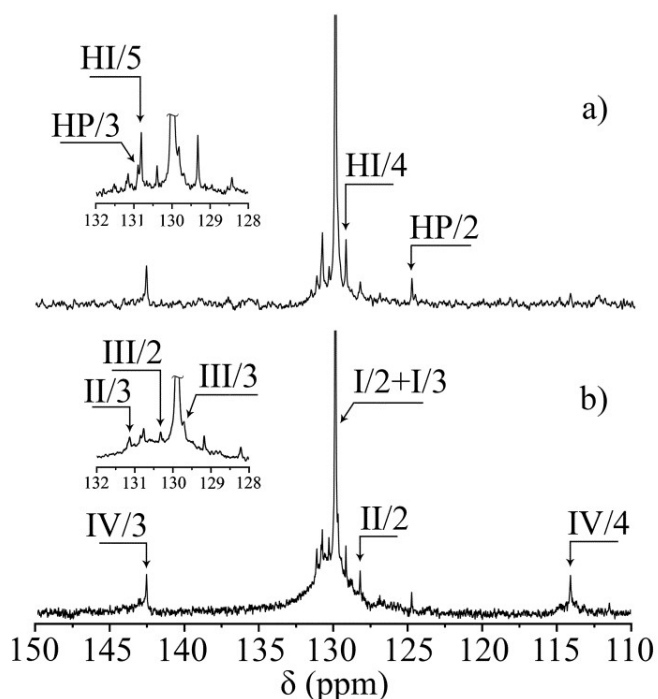

**Fig. S9** Olefinic regions of  $^{13}\text{C}$  NMR spectra of polybutadiene recorded with (a) and without  $T_2$  filter (b), respectively. See Fig. S8 for polymerization conditions.

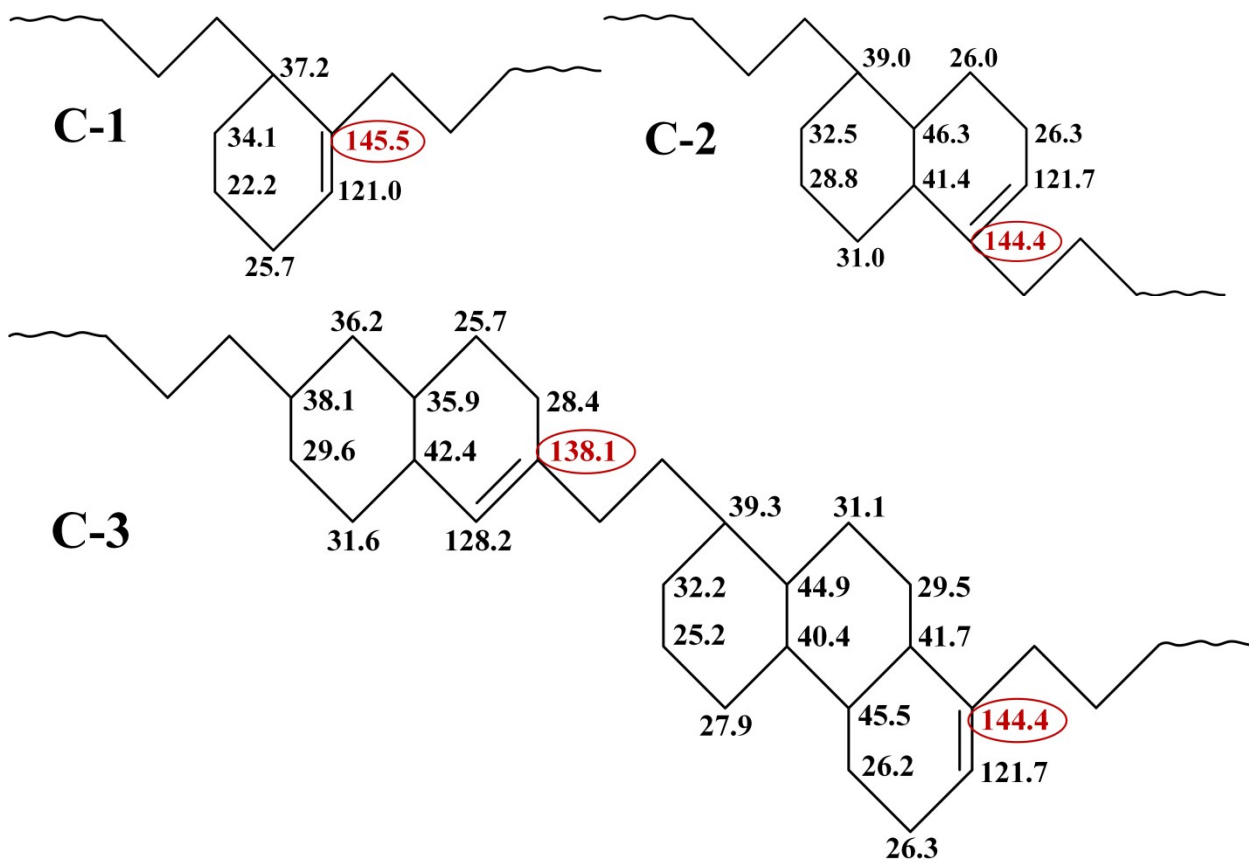

**Fig. S10** Calculated values of chemical shifts of carbon atoms in six-membered cyclic structures proposed in [41, 42].

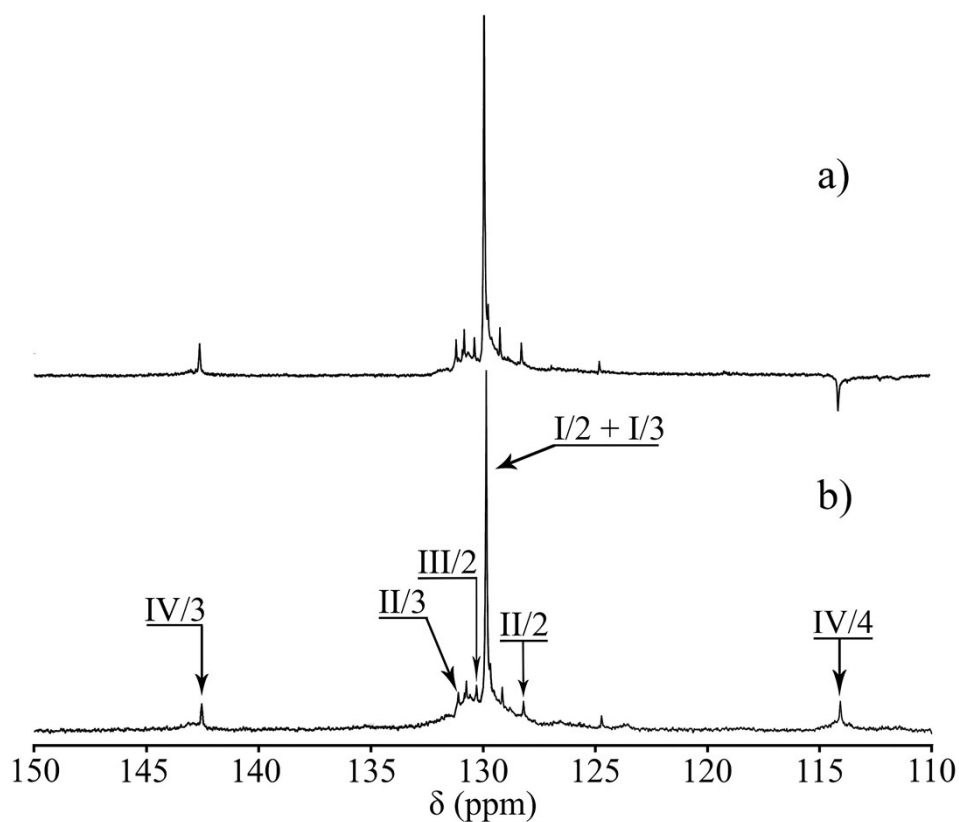

**Fig. S11** Olefinic regions of DEPT-135° <sup>13</sup>C NMR (a) and <sup>13</sup>C NMR-spectra (b) of polybutadiene, respectively. Polymerization condition see in Fig. 4.

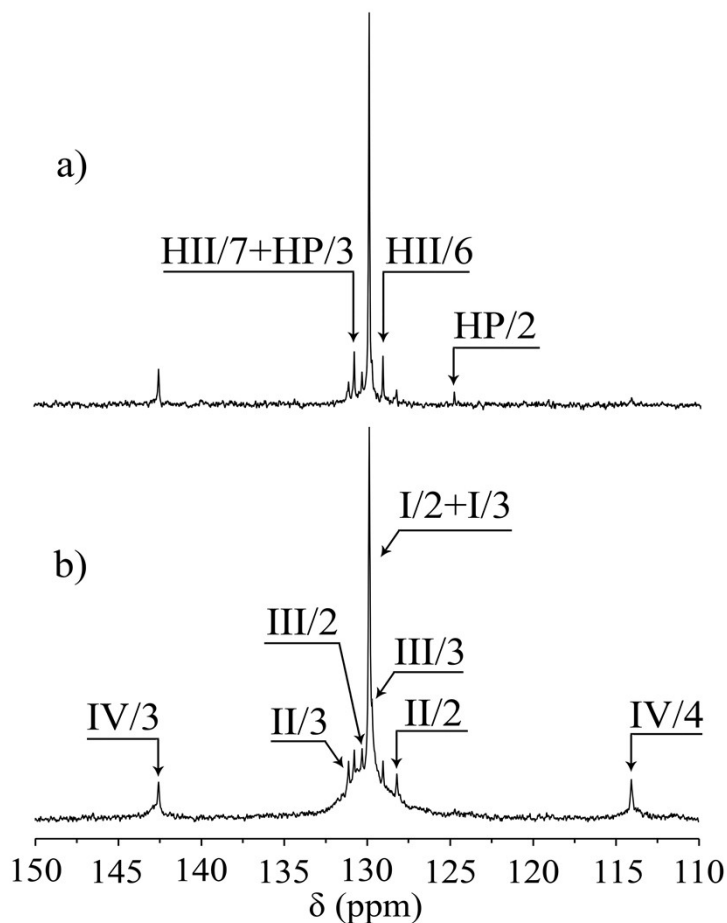

**Fig. S12** Olefinic parts of  $^{13}\text{C}$  NMR spectra of polybutadiene recorded with (a) and without (b)  $T_2$  filter:  $[\text{C}_4\text{H}_6] = 2.0 \text{ M}$ ,  $[\text{Et}_2\text{AlCl}] = 5.0 \cdot 10^{-3} \text{ M}$ ,  $\text{CB}/\text{Et}_2\text{AlCl} = 250$ ,  $\text{CH}_2\text{Cl}_2$ . Temperature:  $-30 \text{ }^\circ\text{C}$ , time: 2h, conversion 58.5 %.

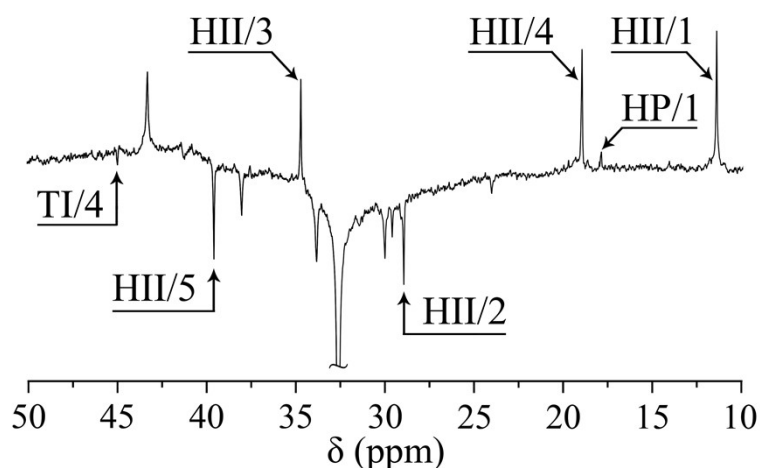

**Fig. S13** Aliphatic part of  $^{13}\text{C}$  DEPT-135 $^\circ$  NMR spectrum of polybutadiene synthesized with  $\text{CB}/\text{Et}_2\text{AlCl}$  initiating system. Polymerization conditions see in Fig. S4.

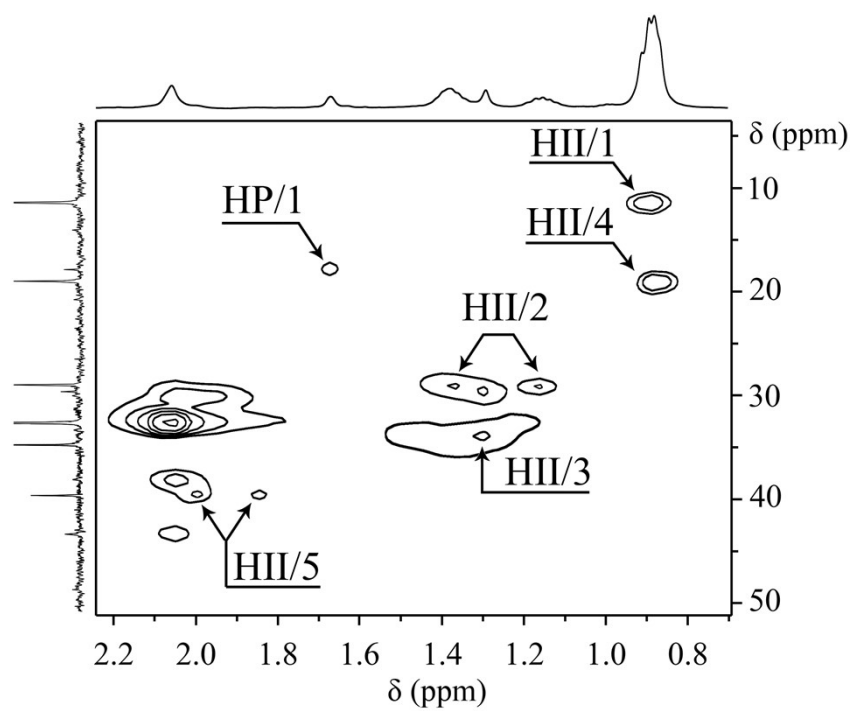

**Fig. S14** Aliphatic part of  $^1\text{H}$ ,  $^{13}\text{C}$  HSQC 2D ЯMP NMR spectrum of polybutadiene synthesized with  $\text{CB}/\text{Et}_2\text{AlCl}$  initiating system. Polymerization conditions see in Fig. S4.

## Structure of polybutadiene synthesized with CB/Et<sub>2</sub>AlCl initiating system

According to <sup>1</sup>H, <sup>13</sup>C HSQC 2D NMR spectrum (Fig. S8), the signals of carbon atoms HII/1 and HII/4 at 11.4 ppm and 18.9 ppm on the carbon scale of the spectrum are located at 0.90 ppm and 0.88 ppm on the proton scale, respectively. As it is seen from fragment of φραγμεντα <sup>1</sup>H, <sup>13</sup>C HMBC 2D NMR spectrum (Fig. 9a), the cross-peaks at 28.9 ppm, 34.7 ppm and 39.6 ppm are observed on a vertical line with signal at 0.88 ppm.

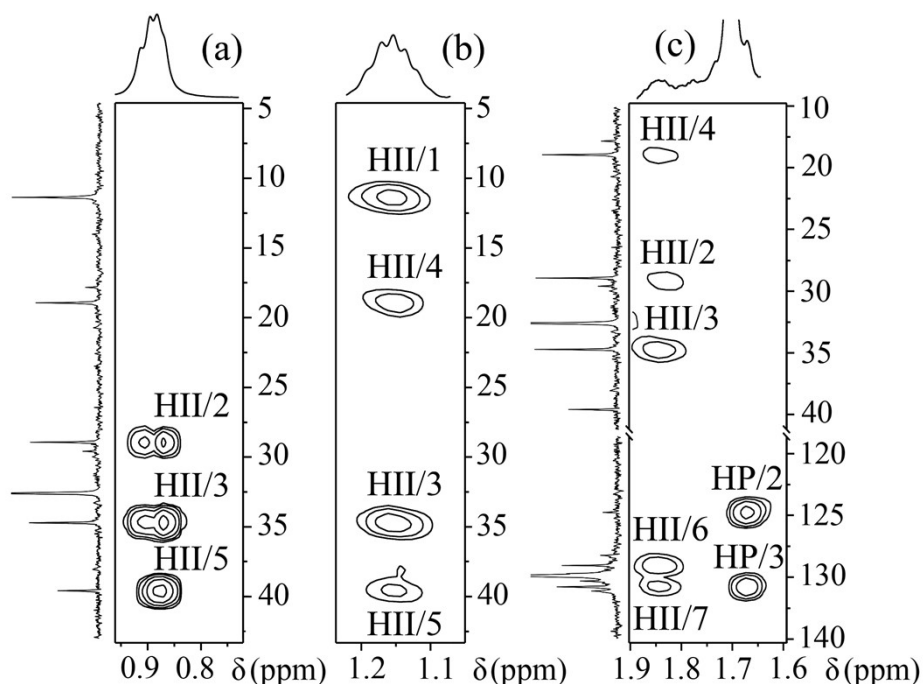

**Fig. S15** Fragments of <sup>1</sup>H, <sup>13</sup>C HMBC 2D NMR spectra of polybutadienes in the regions between 0.80 – 0.90 ppm (a), 1.10 – 1.20 ppm (b) and 1.60 – 1.90 ppm (c) on a proton scale. Polymerization conditions see in Fig. 8.

According to Fig. S8, the signal of carbon atom HII/2 at 28.9 ppm is located in two regions of <sup>1</sup>H NMR spectrum at 1.15 ppm and 1.38 ppm, respectively. On the vertical line at 1.15 ppm in <sup>1</sup>H, <sup>13</sup>C HMBC 2D NMR spectrum of polybutadiene, the cross-peaks at 11.4 ppm, 18.9 ppm, 34.4 ppm and 39.6 ppm were observed (Fig. 9b). This unambiguously proved the belonging of carbon atoms HII/1, HII/2, HII/3, HII/4 and HII/5 to the same structure.

The identification of the position of olefinic carbon atoms in structure HII was performed with the help of <sup>1</sup>H, <sup>13</sup>C HSQC and <sup>1</sup>H, <sup>13</sup>C HMBC NMR spectroscopy. According to <sup>1</sup>H, <sup>13</sup>C HSQC 2D NMR spectroscopy, the signal of carbon atom

HII/5 is located in two regions of  $^1\text{H}$  NMR spectrum at 1.85 ppm and 2.01 ppm, respectively (Fig. S8). On the vertical line of  $^1\text{H}$ ,  $^{13}\text{C}$  HMBC 2D NMR spectrum at 1.85 ppm, the cross-peaks with the signals at 18.9 ppm, 28.9 ppm, 34.7 ppm, 129.0 ppm and 130.8 ppm were observed (Fig. 9c). Last two signals belong to olefinic carbon atoms HII/6 and HII/7 of head group of structure II. It should be noted that signal of carbon atom HII/7 at 130.8 ppm almost coincides with the signal of olefinic carbon atom HP/III of head group of structure HP, which is generated due to protonic initiation [18].
